# Supplementary material for: An Internal Promoter Drives the Expression of a Truncated Form of CCC1 Capable of Protecting Yeast from Iron Toxicity
Source: MDPI journal article supplement (doi:10.3390/microorganisms9061337), 2021-06-20
Supplement: s1 [file s1]

# An internal promoter drives the expression of a truncated form of *CCC1* capable of protecting yeast from iron toxicity

Catarina Amaral, Cristina Teixeira Vicente, Soraia Marques Caetano, Ana Gaspar-Cordeiro, Yang Yang, Peter Cloetens, Célia V. Romão, Claudina Rodrigues-Pousada, Catarina Pimentel\*

## Supplementary material

**Figure S1.** s-Ccc1 is repressed by elements present upstream -90 bp.

**Figure S2.** Removal of *CCC1* promoter and part of the gene coding sequence, still rescues  $\Delta ccc1$  high iron-associated phenotype, independently of the vector used for cloning.

**Figure S3.** Deletion of *YAP5* and *SNF1* does not induce s-Ccc1 expression.

**Figure S4.** s-Ccc1 and Ccc1 stability.

**Figure S5.** Ccc1 is located in the vacuole membranes.

**Table S1.** *Saccharomyces cerevisiae* strains used in this study

**Table S2.** Oligonucleotides used in the study.

**Table S3.** Plasmids used and generated in this study.

**Table S4.** Putative transcription factors binding sites located in the *CCC1* gene region spanning 273 bp upstream the AUG codon, according to YEASTRACT

**References**

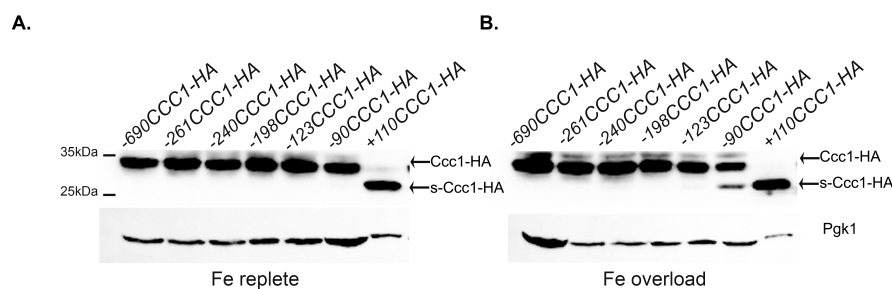

**Figure S1.** s-Ccc1 is repressed by elements present upstream -90 bp. *Δccc1* strain expressing the indicated constructs were grown to mid-exponential phase in the absence (A) or presence (B) of iron supplementation (2mM FeSO<sub>4</sub>) and harvested. Total protein extracts were analyzed by immunoblotting using anti-HA antibody. Pgk1 was used as loading control.

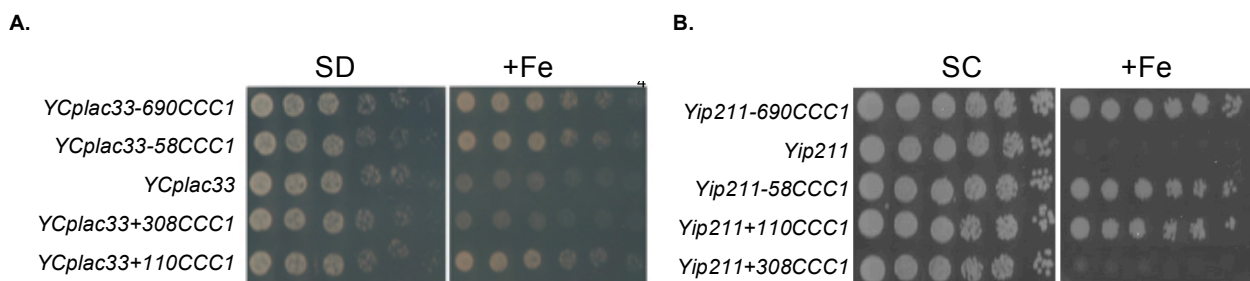

**Figure S2.** Removal of *CCC1* promoter and part of the gene coding sequence, still rescues *Δccc1* high iron-associated phenotype, independently of the vector used for cloning. The fragments -690CCC1, -58CCC1, +110CCC1, +308CCC1 were cloned into (A) the centromeric vector YCplac33 or (B) the integrative vector Yip211. The resulting constructs were used to transform a *Δccc1* strain. Exponentially growing cells were serially diluted and spotted onto control SC/SD plates or SC/SD plates supplemented with FeSO<sub>4</sub> (+Fe).

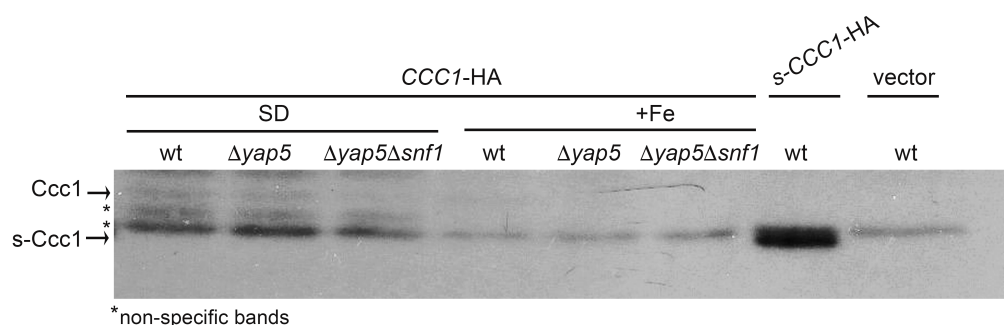

**Figure S3.** Deletion of *YAP5* and *SNF1* does not induce s-Ccc1 expression. Wild type, *Δyap5* and *Δyap5Δsnf1* strains were transformed with either *CCC1*-HA (-690CCC1-HA), *s-CCC1*-HA (+110CCC1-HA) or the empty vector (pRS416) and left untreated (SD) or treated (+Fe) with 5mM FeSO<sub>4</sub> for 4h. Protein extracts were immunoblotted with an anti-HA antibody.

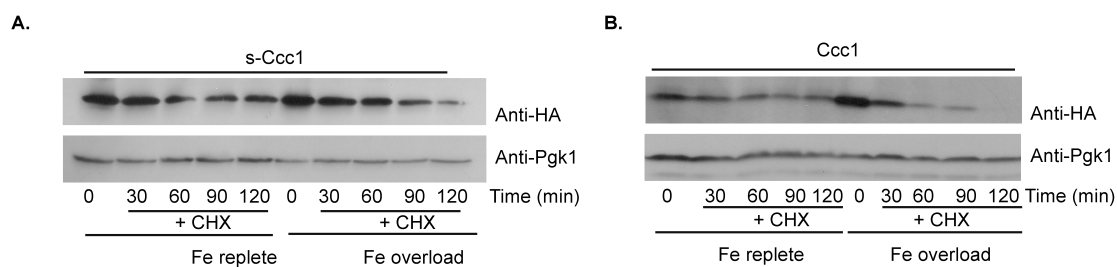

**Figure S4.** s-Ccc1 and Ccc1 stability. Ccc1-HA and s-Ccc1-HA protein stability was assessed by cycloheximide (CHX) chase assay.  $\Delta ccc1$  expressing either the s-Ccc1 (A) or Ccc1 (B) (plasmids *+110CCC1-HA* and *-690CCC1-HA*, respectively) were grown to mid-exponential phase and left untreated or treated with 2 mM of  $\text{FeSO}_4$  for 30 minutes. CHX was then added to a final concentration of 100  $\mu\text{g/mL}$ . Cells were collected at the indicated time points and protein extracts were immunoblotted using an anti-HA antibody. Pgk1 levels were used as a loading control.

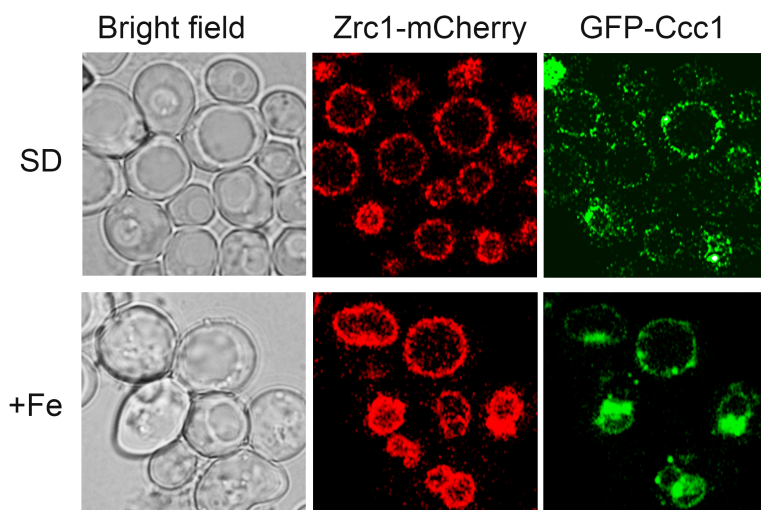

**Figure S5.** Ccc1 is located in the vacuole membranes. A strain with a genomic mCherry tagged copy of *ZRC1* was transformed with a plasmid encoding the fusion GFP- Ccc1. Cells were grown to mid-exponential phase and collected. Live cells were imaged by confocal microscopy under control conditions (SD) and iron overload conditions (+Fe).

**Table S1.** *Saccharomyces cerevisiae* strains used in this study.

| Strain                                    | Genotype                                                                                                                                                                               | Source     |
|-------------------------------------------|----------------------------------------------------------------------------------------------------------------------------------------------------------------------------------------|------------|
| BY4742                                    | MAT $\alpha$ , <i>his3<math>\Delta</math>1 leu2<math>\Delta</math>0 met15<math>\Delta</math>0 ura3<math>\Delta</math>0</i>                                                             | EUROSCARF  |
| $\Delta$ <i>ccc1</i>                      | MAT $\alpha$ , <i>his3<math>\Delta</math>1 leu2<math>\Delta</math>0 met15<math>\Delta</math>0 ura3<math>\Delta</math>0 YLR220w::kanMX4</i>                                             | EUROSCARF  |
| ZRC1-mCherry                              | MAT $\alpha$ , <i>his3<math>\Delta</math>1 leu2<math>\Delta</math>0 met15<math>\Delta</math>0 ura3<math>\Delta</math>0 YMR243c-mCherry <i>his3</i><sup>+</sup></i>                     | This study |
| Ylp2111-690CCC1                           | MAT $\alpha$ , <i>his3<math>\Delta</math>1 leu2<math>\Delta</math>0 met15<math>\Delta</math>0 ura3<math>\Delta</math>0 YLR220w::kanMX4 URA3::-</i><br><i>690CCC1 ura3</i> <sup>+</sup> | This study |
| Ylp2111-58CCC1                            | MAT $\alpha$ , <i>his3<math>\Delta</math>1 leu2<math>\Delta</math>0 met15<math>\Delta</math>0 ura3<math>\Delta</math>0 YLR220w::kanMX4 URA3::-</i><br><i>58CCC1 ura3</i> <sup>+</sup>  | This study |
| Ylp2111+110CCC1                           | MAT $\alpha$ , <i>his3<math>\Delta</math>1 leu2<math>\Delta</math>0 met15<math>\Delta</math>0 ura3<math>\Delta</math>0 YLR220w::kanMX4</i><br><i>URA3::+110CCC1 ura3</i> <sup>+</sup>  | This study |
| Ylp2111+308CCC1                           | MAT $\alpha$ , <i>his3<math>\Delta</math>1 leu2<math>\Delta</math>0 met15<math>\Delta</math>0 ura3<math>\Delta</math>0 YLR220w::kanMX4</i><br><i>URA3::+308CCC1 ura3</i> <sup>+</sup>  | This study |
| $\Delta$ <i>yap5</i>                      | MAT $\alpha$ , <i>his3<math>\Delta</math>1 leu2<math>\Delta</math>0 met15<math>\Delta</math>0 ura3<math>\Delta</math>0 YIR018w::kanMX4</i>                                             | EUROSCARF  |
| $\Delta$ <i>snf1</i>                      | MAT $\alpha$ , <i>his3<math>\Delta</math>1 leu2<math>\Delta</math>0 met15<math>\Delta</math>0 ura3<math>\Delta</math>0 YDR477w::his3MX6</i>                                            | This study |
| $\Delta$ <i>yap5</i> $\Delta$ <i>snf1</i> | MAT $\alpha$ , <i>his3<math>\Delta</math>1 leu2<math>\Delta</math>0 met15<math>\Delta</math>0 ura3<math>\Delta</math>0 YIR018w::kanMX4</i><br><i>YDR477w::his3MX6</i>                  | This study |



**Table S2.** Oligonucleotides used in the study.

| Name              | Sequence 5'- 3'                                       | Use                                               |
|-------------------|-------------------------------------------------------|---------------------------------------------------|
| CCC1_A1           | TACAGGACCAACCCCTCAG                                   | -690CCC1                                          |
| CCC1_A4           | GGTTATCATGGATCACCTGA                                  | Several CCC1 constructs                           |
| pCCC1-240         | CTTTGTTAGCCCGAATGCTCTC                                | -240CCC1                                          |
| pCCC1-198         | GATTATATGAAAAATTGATACAAAAC                            | -198CCC1                                          |
| pCCC1-123         | GTAAAGCGACATCACTCTC                                   | -123CCC1                                          |
| pCCC1-114         | GGTTTATAGAAATAGAAATATAAC                              | -114 CCC1                                         |
| pCCC1-90          | GAACGAAGCCTTTAGACTCT                                  | -90CCC1 and -90CCC1-HA                            |
| pCCC1-58          | TGGTATATTGAACAAAGAAA                                  | -58CCC1, -58CCC1-HA and yEp356R-58                |
| qCcc1_Fw          | AACGCAGTGGTGACCCTTAT                                  | qRT-PCR                                           |
| qCcc1_Rev         | TCCTGCGCTGAATTTCTACC                                  |                                                   |
| CCC1_DM_HA_Fw     | CTTTGTTAAGTTACTGGGTATGTACCCATACGATGTTCCAGATTACGCTTAAG |                                                   |
|                   | TGTAAGTAACAACAC                                       | -690CCC1-HA                                       |
| CCC1_DM_HA_Rv     | GTGTTGTTACTTTACACTTAAGCGTAATCTGGAACATCGTATGGGTACATAC  |                                                   |
|                   | CCAGTAACCTTAACAAAG                                    |                                                   |
| EcoRI_pCCC1_Rv    | ggGAATTCCTCAACAAGGGAGTTGAT                            | yEp356R-58                                        |
| IN_ORF1_CCC1      | ATGTCCATTGTAGCACTAAAGAA                               | yEp356R+1                                         |
| IN_ORF2_CCC1      | GTAGTAATAGCAATAGTTCAAG                                | +110CCC1, +110CCC1-HA                             |
| IN_ORF3_CCC1      | ATGTGATTATCGGGCTAAGC                                  | +308CCC1                                          |
| mATG_leu_2_Fw     | AACTCACCITGTCACTAGGG                                  | +110CCC1 <sup>mut</sup> -HA                       |
| mATG_leu_2_Rv     | CCCTACTGACAACTGGTGAGTT                                |                                                   |
| Frame_2_Fw        | AATATTATGTCgCATTGTAGCACT                              | -690CCC1 <sup>frame</sup> -HA and -               |
| Frame_2_Rv        | AGTGCTACAATGcGACATAATATT                              | 90CCC1 <sup>frame</sup> -HA                       |
| BamHI_mCherry_Fw2 | ggCGGATCCCCGGGTAAATTAACAGTATGGTCAGCAAGGGAGAGGAAGATA   | pFA6a-mCherry-His3MX6                             |
|                   | A                                                     |                                                   |
| Ascl_mCherry_2_Rv | ggcgccctATTTGTATAATTCGTCCAT                           |                                                   |
| Zrc1_F2           | gctgtaactgcaactctccattgctgCGGATCCCCGGGTTAATTAA        | ZRC1 C-terminal mCherry tag K7                    |
| Zrc1_R1           | aglatatagtttatgtctctgtagaacatGAATTCGAGCTCGTTTAAAC     |                                                   |
| CCC1_2ATG_Fw      | ATGTCAGTAGGGAAAGATAATAGGA                             | GFP-s-CCC1                                        |
| HA_Clal_rv        | ccacatcgatAGCGTAATCTGGAACATC                          | GFP-s-CCC1                                        |
| T7_CCC1_Rv        | TAATACGACTCACTATAGG CCAGTAACCTTAACAAAGAACC            | Northern blot                                     |
| CCC1_F            | AACGCAGTGGTGACCCTTAT                                  | Northern blot probe                               |
| CCC1_R            | ACCACCCACAACAACCATTT                                  | Northern blot probe                               |
| Frame_2_Fw        | AATATTATGTCgCATTGTAGCACT                              | -690CCC1 <sup>frame</sup> -HA and -               |
| Frame_2_Rv        | AGTGCTACAATGcGACATAATATT                              | 90CCC1 <sup>frame</sup> -HA                       |
| pRS416_lacZ_Rv    | GGGCTGCAGGAATTCGATATC                                 | -25CCC1-HA, +40CCC1-HA, +60CCC1-HA and +80CCC1-HA |
| pRS416-25Fw       | GAATTCCTGCAGCCC TCCCATATCTCGTGACACAAATAT              | -25CCC1-HA                                        |
| pRS416+40Fw       | GAATTCCTGCAGCCCTACAGAAAGCGAAAGGTAGTGGT                | +40CCC1-HA                                        |
| pRS416+60Fw       | GAATTCCTGCAGCCCTGGTGGAACCTCAGAGTTGG                   | +60CCC1-HA                                        |
| pRS416+80Fw       | GAATTCCTGCAGCCCGGGGTCTGAATCAACTCCC                    | +80CCC1-HA                                        |
| SNF1_HIS_Fw       | TTTGTAAACAAGTTTGTCTACACTCCCTTAATAAAGTCAAC             |                                                   |
|                   | ATCGTACGCTGCAGG                                       | Disruption of SNF1                                |
| SNF1_HIS_Rv       | AACTTCCATATCATTCTTTACGTTCCACCATCAATTGC                |                                                   |
|                   | TTAGGGAGACCGGCAGAT                                    |                                                   |

**Table S3.** Plasmids used and generated in this study.

| Plasmid Name                       | Description                                                                                                                                                          | Reference           |
|------------------------------------|----------------------------------------------------------------------------------------------------------------------------------------------------------------------|---------------------|
| <b>-690CCC1</b>                    | PCR amplification from genomic DNA (BY4742, WT) using CCC1-A1 and CCC1-A4 primers and cloning into pRS416 (SmaI)                                                     | [1]                 |
| <b>pRS416</b>                      | <i>CEN, URA</i>                                                                                                                                                      | [2]                 |
| <b>-273CCC1</b>                    | -690CCC1 digested with KpnI and cloned into pRS416 (KpnI, SmaI)                                                                                                      | [1]                 |
| <b>-240CCC1</b>                    | PCR amplification of -690CCC1 using CCC1-240 and -A4 primers and cloning into pRS416 (SmaI)                                                                          | This study          |
| <b>-198CCC1</b>                    | PCR amplification of -690CCC1 using CCC1-198 and -A4 primers and cloning into pRS416 (SmaI)                                                                          | This study          |
| <b>-114CCC1</b>                    | PCR amplification of -690CCC1 using CCC1-114 and -A4 primers and cloning into pRS416 (SmaI)                                                                          | This study          |
| <b>-90CCC1</b>                     | PCR amplification of -690CCC1 using CCC1-90 and -A4 primers and cloning into pRS416 (SmaI)                                                                           | This study          |
| <b>-58CCC1</b>                     | PCR amplification of -690CCC1 using CCC1-58 and -A4 primers and cloning into pRS416 (SmaI)                                                                           | This study          |
| <b>-690CCC1-HA</b>                 | -690CCC1 with a HA epitope before the stop codon. CCC1 was amplified using a three-step-PCR strategy as described previously [1] and cloned into pRS416 (SmaI)       | This study          |
| <b>-90CCC1-HA</b>                  | PCR amplification of -690CCC1-HA using CCC1-90 and CCC1-A4 primers and cloning into pRS416 (SmaI)                                                                    | This study          |
| <b>-58CCC1-HA</b>                  | PCR amplification of -690CCC1-HA using CCC1-58 and CCC1-A4 primers and cloning into pRS416 (SmaI)                                                                    | This study          |
| <b>YEp356R-58</b>                  | PCR amplification of -690CCC1 using CCC1-58 and EcoRI_pCCC1_Rv and cloning in YEp356R (SmaI, EcoRI)                                                                  | This study          |
| <b>YEp356R+1</b>                   | PCR amplification of -690CCC1 using IN_ORF_CCC1 and EcoRI_pCCC1_Rv and cloning in YEp356R (SmaI, EcoRI)                                                              | This study          |
| <b>YEp356R</b>                     | <i>2μ, URA, lacZ</i>                                                                                                                                                 | [3]                 |
| <b>Ylp211-690CCC1</b>              | PCR amplification of -690CCC1 using CCC1-A1 and -A4 primers and cloning into Ylpac211 (SmaI)                                                                         |                     |
| <b>Ylp211-58CCC1</b>               | PCR amplification of -690CCC1 using CCC1-58 and -A4 primers and cloning into Ylpac211 (SmaI)                                                                         | This study          |
| <b>Ylp211+110CCC1</b>              | PCR amplification of -690CCC1 using IN_ORF2_CCC1 and -A4 primers and cloning into Ylpac211 (SmaI)                                                                    | This study          |
| <b>Ylp211+308CCC1</b>              | PCR amplification of -690CCC1 using IN_ORF3_CCC1 and -A4 primers and cloning into Ylpac211 (SmaI)                                                                    | This study          |
| <b>+110CCC1</b>                    | PCR amplification of -690CCC1 using IN_ORF2_CCC1 and -A4 primers and cloning into pRS416 (SmaI)                                                                      |                     |
| <b>+308CCC1</b>                    | PCR amplification of -690CCC1 using IN_ORF3_CCC1 and -A4 primers and cloning into pRS416 (SmaI)                                                                      |                     |
| <b>+110CCC1-HA</b>                 | PCR amplification of -690CCC1-HA using IN_ORF2_CCC1 and -A4 primers and cloning into pRS416 (SmaI)                                                                   | This study          |
| <b>+110CCC1<sup>mut</sup>-HA</b>   | PCR site directed mutagenesis of +110CCC1-HA ATG using MATG_leu_2_Fw and MATG_leu_2_Rv                                                                               | This study          |
| <b>-690CCC1<sup>frame</sup>-HA</b> | PCR site directed mutagenesis of -690CCC1-HA using Frame_2_Fw and Frame_2_Rv                                                                                         | This study          |
| <b>-90CCC1<sup>frame</sup>-HA</b>  | PCR site directed mutagenesis of -90CCC1-HA using Frame_2_Fw and Frame_2_Rv                                                                                          | This study          |
| <b>-25CCC1-HA</b>                  | PCR amplification of -90CCC1-HA using pRS416-25Fw and pRS416_lacZ_Rv followed by <i>in vivo</i> bacterial assembly                                                   | This study          |
| <b>+40CCC1-HA</b>                  | PCR amplification of -90CCC1-HA using pRS416+40Fw and pRS416_lacZ_Rv followed by <i>in vivo</i> bacterial assembly                                                   | This study          |
| <b>+60CCC1-HA</b>                  | PCR amplification of -90CCC1-HA using pRS416+60Fw and pRS416_lacZ_Rv followed by <i>in vivo</i> bacterial assembly                                                   | This study          |
| <b>+80CCC1-HA</b>                  | PCR amplification of -90CCC1-HA using pRS416+80Fw and pRS416_lacZ_Rv followed by <i>in vivo</i> bacterial assembly                                                   | This study          |
| <b>pFA6a-mCherry-His3MX6</b>       | PCR amplified Cherry with BamHI_mCherry_Fw_2 and AscI_mCherry_2_Rv cloned in pFA6a-GFP(S65T)His3MX6 (AscI, BamHI)                                                    | This study          |
| <b>pFA6a-GFP(S65T)-His3MX6</b>     | <i>HIS3, GFP</i>                                                                                                                                                     | [4]                 |
| <b>pUG36</b>                       | <i>CEN, URA, pMET17, GFP-</i>                                                                                                                                        | GenBank: AF298791.1 |
| <b>GFP-s-CCC1</b>                  | PCR amplification of CCC1-HA using CCC1_2ATG_Fw and HA_ClaI_Rv primers and cloning into pUG36 (SmaI, ClaI). The plasmid is a fusion between GFP and +207 bp of CCC1. | This study          |
| <b>GFP-CCC1</b>                    | PCR amplification of CCC1-HA using IN_ORF_1_CCC1 and HA_ClaI_Rv primers and cloning into pUG36 (SmaI, ClaI). The plasmid is a fusion between GFP and +1 bp of CCC1   | This study          |
| <b>-261CCC1-HA</b>                 | PCR amplification of -690CCC1-HA using CCC1-261 and -A4 primers and cloning into pRS416 (SmaI)                                                                       | This study          |
| <b>-240CCC1-HA</b>                 | PCR amplification of -690CCC1-HA using CCC1-240 and -A4 primers and cloning into pRS416 (SmaI)                                                                       | This study          |
| <b>-198CCC1-HA</b>                 | PCR amplification of -690CCC1-HA using CCC1-198 and -A4 primers and cloning into pRS416 (SmaI)                                                                       | This study          |
| <b>-123CCC1-HA</b>                 | PCR amplification of -690CCC1-HA using CCC1-123 and -A4 primers and cloning into pRS416 (SmaI)                                                                       | This study          |

**Table S4.** Putative transcription factors binding sites located in the *CCC1* gene region spanning 273 bp upstream the AUG codon, according to YEASTRACT (<http://www.yeasttract.com>).

| Transcription Factor               | Consensus <sup>a</sup> | Position <sup>b</sup> |
|------------------------------------|------------------------|-----------------------|
| Msn2, Msn4, Nrg1, Rph1             | CCCCT                  | -270                  |
| Rtg1, Rtg3                         | GGTAC                  | -268                  |
| Gis1, Msn2, Msn4, Rph1, Com2, Usv1 | AGGGG                  | -265                  |
| Swi4                               | CACGAAA                | -259                  |
| Rtg1, Rtg3                         | GTCAC                  | -257                  |
| Fkh1, Fkh2                         | AAACA                  | -242                  |
| Tec1                               | GAATGT                 | -229                  |
| Stb5                               | CGGNS                  | -228                  |
| Rox1                               | ACAAT                  | -220                  |
| Pho2                               | WTAWTW                 | -199                  |
| Mot2                               | ATATA                  | -191,-189             |
| Mot2                               | ATATA                  | -189                  |
| Pho2                               | WTAWTW                 | -155                  |
| Ash1                               | YTGAT                  | -151                  |
| Pho2                               | WTAWTW                 | -94                   |
| Fkh1,Fkh2p                         | RYMAAYA                | -56                   |
| Mot2                               | ATATA                  | -52                   |

<sup>a</sup>N- any base pair, S- C or G, W- A or T, Y- C or T

<sup>b</sup>bp upstream the ATG triplet encoding the first Ccc1 methionine

## References

1. Pimentel, C., et al., *The role of the Yap5 transcription factor in remodeling gene expression in response to Fe bioavailability*. PLoS One, 2012. **7**(5): p. e37434.
2. Sikorski, R.S. and P. Hieter, *A system of shuttle vectors and yeast host strains designed for efficient manipulation of DNA in Saccharomyces cerevisiae*. Genetics, 1989. **122**(1): p. 19-27.
3. Myers, A.M., et al., *Yeast shuttle and integrative vectors with multiple cloning sites suitable for construction of lacZ fusions*. Gene, 1986. **45**(3): p. 299-310.
4. Longtine, M.S., et al., *Additional modules for versatile and economical PCR-based gene deletion and modification in Saccharomyces cerevisiae*. Yeast, 1998. **14**(10): p. 953-61.
